# Supplementary material for: Evaluation of 34 Cytokines and Vitamin D Status Reveal A Sexually-Dimorphic Active Immune Response to SARS-CoV-2
Source: MDPI journal article supplement (doi:10.3390/healthcare10122571), 2022-12-19
Supplement: s1 [file s1]

**Supplementary Table S1.** General anthropometric and clinical characteristics of study participants

| Parameters                         | Negative         | Positive          | P-value |
|------------------------------------|------------------|-------------------|---------|
| <b>N</b>                           | <b>82 (37.3)</b> | <b>138 (62.7)</b> |         |
| <b>Demographics</b>                |                  |                   |         |
| Male/Female                        | 41/41            | 79/59             | 0.30    |
| Saudi                              | 57 (69.5)        | 82 (59.4)         | 0.13    |
| Non-Saudi                          | 25 (30.5)        | 56 (40.6)         |         |
| Age (years)                        | 32.3 ± 13.1      | 49.7 ± 12.6       | <0.001  |
| BMI (kg/m <sup>2</sup> )           | 26.6 ± 5.1       | 28.9 ± 5.5        | <0.001  |
| WHR                                | 1.0 ± 0.1        | 1.0 ± 0.1         | 0.45    |
| Systolic BP (mmHg)                 | 119.0 ± 9.6      | 130.1 ± 17.8      | <0.001  |
| Diastolic BP (mmHg)                | 75.7 ± 8.7       | 75.2 ± 12.4       | 0.75    |
| <b>Vital Signs</b>                 |                  |                   |         |
| Temperature (°C)                   | 36.6 ± 0.5       | 37.5 ± 1.2        | <0.001  |
| Pulse Rate                         | 94.0 ± 15.3      | 91.6 ± 16.9       | 0.31    |
| Respiratory Rate                   | 19.7 ± 2.6       | 23.5 ± 3.8        | <0.001  |
| <b>Medical History of Patients</b> |                  |                   |         |
| Obesity                            | 21 (27.6)        | 48 (36.4)         | 0.20    |
| DM                                 | 14 (17.7)        | 88 (68.2)         | <0.001  |
| Hypertension                       | 5 (6.1)          | 48 (34.8)         | <0.001  |
| Cancer                             | 4 (4.9)          | 0 (0.0)           | 0.06    |
| RA                                 | 2 (2.4)          | 3 (2.2)           | 0.90    |
| CLD                                | 0 (0.0)          | 1 (0.7)           | 0.72    |
| Thyroid Disease                    | 2 (2.4)          | 3 (2.2)           | 0.90    |
| Epilepsy                           | 0 (0.0)          | 2 (1.4)           | 0.48    |
| Chronic Immobilization             | 0 (0.0)          | 1 (0.7)           | 0.72    |
| Asthma                             | 1 (1.2)          | 9 (6.5)           | 0.10    |
| Hyperlipidemia                     | 0 (0.0)          | 14 (10.1)         | 0.04    |
| Heart Disease                      | 0 (0.0)          | 10 (7.2)          | 0.07    |
| Anemia                             | 3 (3.7)          | 0 (0.0)           | 0.10    |
| CKD                                | 0 (0.0)          | 5 (3.6)           | 0.19    |
| Hypertriglyceridemia               | 18 (22.8)        | 48 (36.9)         | 0.04    |
| Low HDL                            | 28 (35.4)        | 106 (81.5)        | <0.001  |
| <b>Supplementation</b>             |                  |                   |         |
| Using Vitamin C before Pandemic    | 1 (1.2)          | 0                 | 0.32    |
| Using Vitamin C after Pandemic     | 6 (7.3)          | 79 (57.2)         | <0.001  |
| Using Vitamin D before Pandemic    | 3 (3.7)          | 0                 | 0.08    |
| Using Vitamin D after Pandemic     | 1 (1.2)          | 57 (41.3)         | <0.001  |

Note: Data presented as N (%). p<0.05 considered significant.

**Supplementary Table S2.** Correlation between vitamin D and select study parameters according to COVID-19 status

| Parameters               | Control |       | Case   |       |
|--------------------------|---------|-------|--------|-------|
|                          | R       | P     | R      | P     |
| Age (years)              | 0.17    | 0.15  | 0.15   | 0.11  |
| BMI (kg/m <sup>2</sup> ) | 0.04    | 0.72  | 0.03   | 0.73  |
| WHR                      | 0.18    | 0.13  | 0.06   | 0.65  |
| Systolic BP (mmHg)       | 0.15    | 0.22  | 0.10   | 0.27  |
| Diastolic BP (mmHg)      | 0.08    | 0.51  | -0.04  | 0.67  |
| Temperature (°C)         | 0.08    | 0.51  | 0.00   | 0.97  |
| Pulse Rate               | 0.26*   | 0.032 | -0.01  | 0.94  |
| Respiratory Rate         | 0.01    | 0.96  | 0.32** | 0.000 |
| <b>Cytokines</b>         |         |       |        |       |
| EGF (pg/ml)              | -0.14   | 0.25  | 0.05   | 0.74  |
| FGF2 (pg/ml)             | -0.21   | 0.07  | 0.07   | 0.68  |
| EOTAXIN (pg/ml)          | -0.14   | 0.25  | 0.05   | 0.76  |
| TFG $\alpha$ (pg/ml)     | -0.02   | 0.83  | 0.14   | 0.33  |
| GCSF (pg/ml)             | -0.07   | 0.62  | -0.18  | 0.28  |
| GMCSF                    | -0.16   | 0.18  | 0.01   | 0.96  |
| Fractalkine (pg/ml)      | -0.07   | 0.61  | -0.02  | 0.91  |
| IFN $\alpha$ 2 (pg/ml)   | -0.17   | 0.16  | -0.15  | 0.41  |
| GRO (pg/ml)              | -0.19   | 0.15  | 0.27   | 0.12  |
| MCP3 (pg/ml)             | -0.27*  | 0.049 | 0.00   | 1.00  |
| MDC (pg/ml)              | -0.14   | 0.24  | -0.13  | 0.39  |
| IL15 (pg/ml)             | 0.07    | 0.63  | 0.16   | 0.28  |
| sCD40L (pg/ml)           | 0.00    | 0.98  | -0.25  | 0.09  |
| IL1RA (pg/ml)            | -0.16   | 0.28  | 0.05   | 0.76  |
| IL1a (pg/ml)             | 0.05    | 0.78  | 0.35   | 0.12  |
| IL1b (pg/ml)             | -0.05   | 0.77  | -0.21  | 0.26  |
| IL2 (pg/ml)              | -0.06   | 0.67  | -0.12  | 0.53  |
| IL4 (pg/ml)              | -0.16   | 0.18  | 0.19   | 0.23  |
| IL7 (pg/ml)              | -0.19   | 0.12  | 0.20   | 0.21  |
| IL8 (pg/ml)              | 0.03    | 0.78  | 0.10   | 0.50  |
| IP10 (pg/ml)             | 0.19    | 0.12  | -0.07  | 0.65  |
| MCP1 (pg/ml)             | 0.09    | 0.47  | -0.25  | 0.10  |
| MIP1a (pg/ml)            | -0.10   | 0.43  | 0.07   | 0.64  |
| MIP1b (pg/ml)            | -0.04   | 0.72  | -0.14  | 0.37  |
| VEGF (pg/ml)             | 0.14    | 0.26  | 0.07   | 0.64  |
| CRP (ug/dl)              | 0.13    | 0.28  | -0.14  | 0.37  |
| IFN $\gamma$ (pg/ml)     | -0.05   | 0.67  | 0.11   | 0.43  |
| IL10 (pg/ml)             | 0.01    | 0.95  | 0.22   | 0.11  |
| IL13 (pg/ml)             | 0.14    | 0.26  | 0.03   | 0.86  |
| IL17a (pg/ml)            | -0.18   | 0.13  | -0.12  | 0.40  |
| IL23 (pg/ml)             | -0.07   | 0.55  | 0.09   | 0.53  |
| IL5 (pg/ml)              | 0.00    | 1.00  | 0.07   | 0.64  |

|                      |      |      |       |      |
|----------------------|------|------|-------|------|
| IL6 (pg/ml)          | 0.04 | 0.76 | -0.05 | 0.75 |
| TNF $\alpha$ (pg/ml) | 0.00 | 1.00 | 0.03  | 0.84 |

Note: Data presented as Spearman correlation coefficients.

A

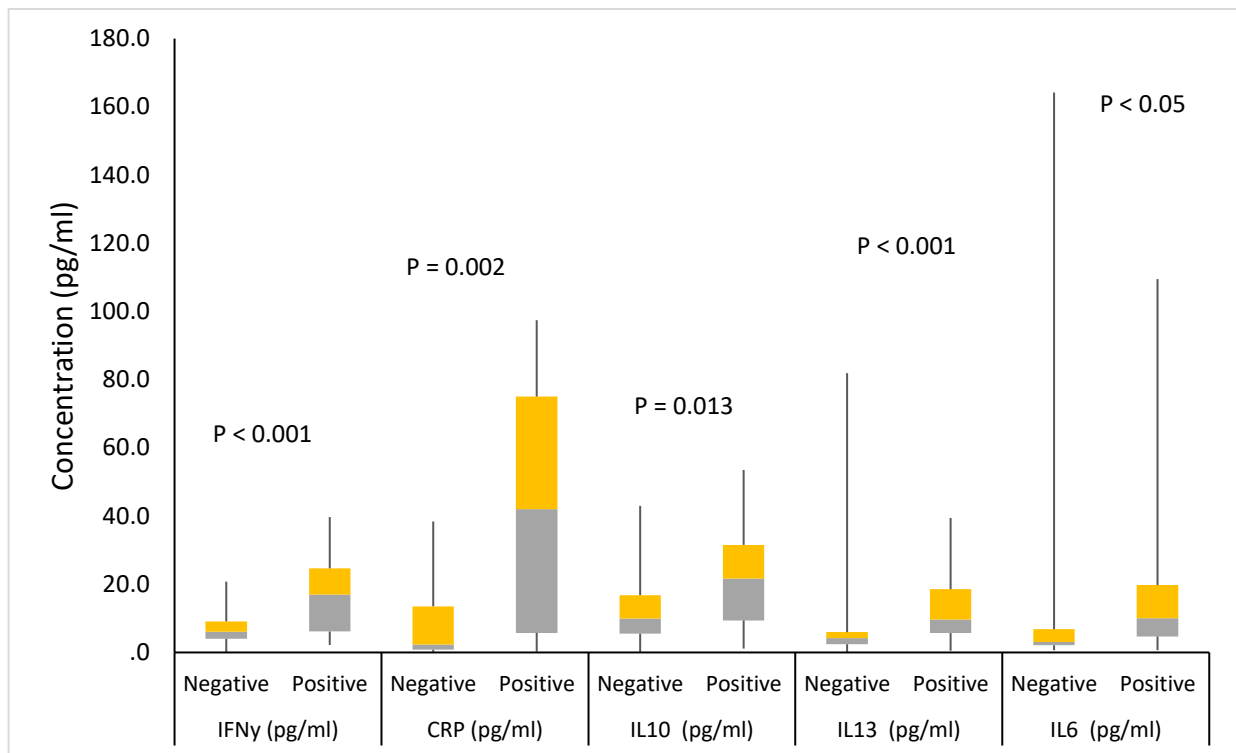

B

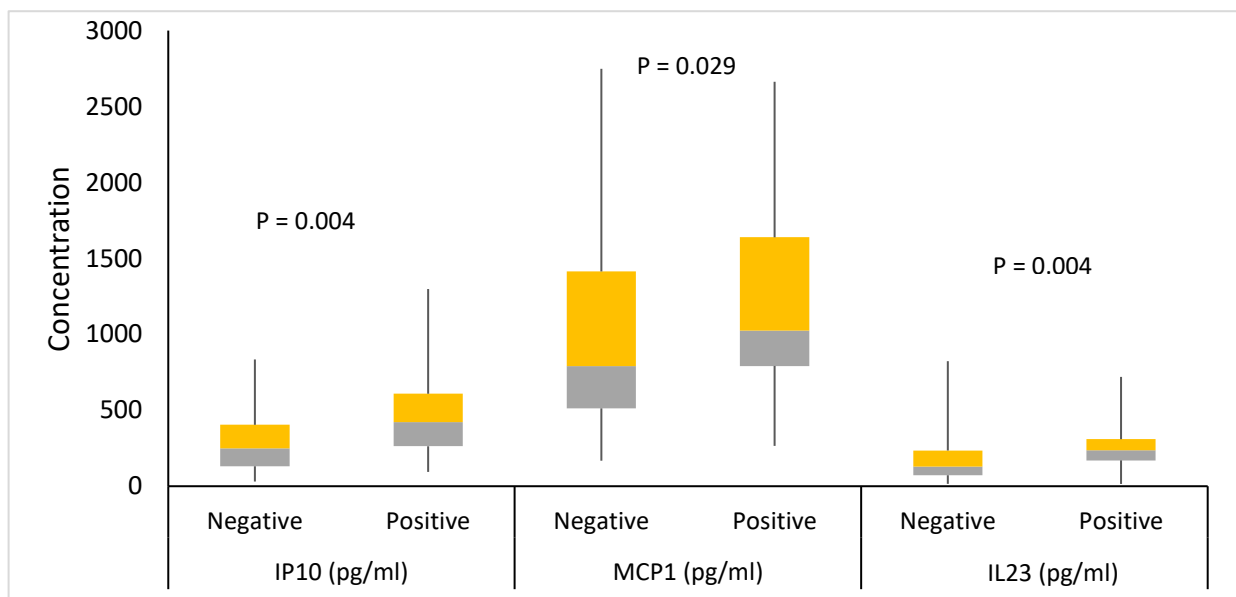

**Figure S1.** Serum cytokine and chemokine levels of SARS-CoV-2 patients (positive) and healthy controls (negative). Data are expressed as median with 25th and 75th percentiles. Abbreviations: A: IFN $\gamma$ , interferon gamma; CRP, C-reactive protein; IL, interleukin. B: IP-10, IFN- $\gamma$  inducible protein-10; MCP, monocyte chemoattractant protein, IL, interleukin.
